# Supplementary material
Source: publisher figshare collection journal article supplement (https://acs.figshare.com/ndownloader/files/4017904)
Supplement: Supplementary file 1 [file 4017904]

## Supporting Information

### Single Molecule Conductance, thermopower and Transition Voltage

Shaoyin Guo<sup>1</sup>, Gang Zhou<sup>2</sup>, and Nongjian Tao<sup>1\*</sup>

<sup>1</sup>Center for Bioelectronics and Biosensors, Biodesign Institute, and

Departments of Electrical Engineering, Arizona State University, Tempe, Arizona 85287

<sup>2</sup>Laboratory of Advanced Materials, Fudan University, Shanghai 200438, China

#### Circuit current offset and calibration:

In order to measure the thermoelectric effect of a single molecule, it is necessary to ensure that the offset current/voltage of the electric circuit is sufficiently stable during the measurement. Fig. S1a shows the schematics of the current preamplifier circuit used in the experiment, where resistor,  $R_M$ , represents the molecular junction, current source,  $I_{TE}$ , represents the thermoelectric current,  $U_{os}$  and  $I_{os}$  are the input offset voltage and current of the circuit, respectively.

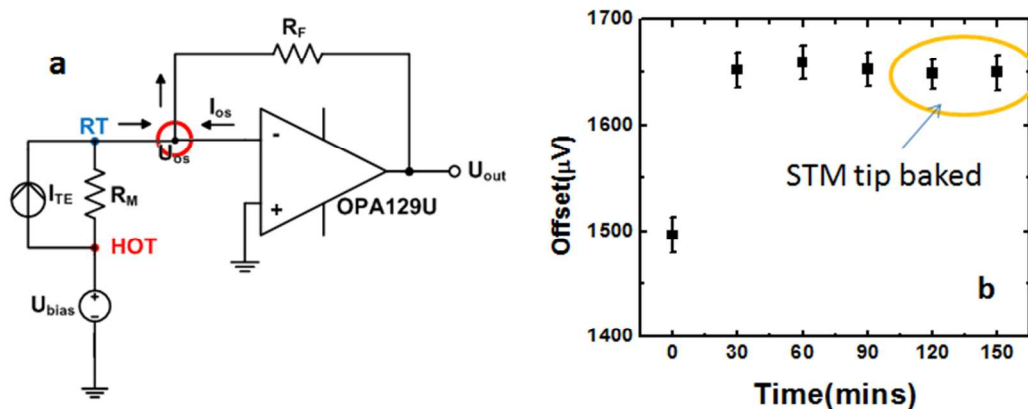

Fig. S1. (a) Circuit diagram of a current pre-amplifier used in the experiment. (b) The stability of the circuit offset.

Kirchhoff's current law at the circled node gives rise to

$$U_{\text{out}} = \frac{R_F}{R_M} (U_{\text{os}} - U_{\text{bias}}) + U_{\text{os}} - I_{\text{os}} R_F - I_{\text{TE}} R_F. \quad (\text{S1})$$

The total input current offset at zero applied bias,  $I_{\text{TE,m}}$ , is then given by

$$I_{\text{TE,m}} = \frac{U_{\text{out}}|_{U_{\text{bias}}=0}}{-R_F} = I_{\text{TE}} + I_{\text{os}} - U_{\text{os}} \left( \frac{1}{R_M} + \frac{1}{R_F} \right) = I_{\text{TE}} + I_0, \quad (\text{S2})$$

where  $I_0 = I_{\text{os}} - U_{\text{os}} \left( \frac{1}{R_M} + \frac{1}{R_F} \right)$  is the total offset current due to the circuit itself.

The corresponding voltage offset including the thermoelectric effect is given by

$$U_{\text{TE,m}} = U_{\text{TE}} + I_{\text{os}} R_M - U_{\text{os}} R_M \left( \frac{1}{R_M} + \frac{1}{R_F} \right), \quad (\text{S3})$$

where  $U_{\text{TE}} = I_{\text{TE}} R_M$ .

In order to ensure that the measured voltage offset is independent of the molecular resistance,  $R_M$ , a large  $R_F$  was used (e.g.,  $R_F = 100 \times R_M$ ), and the measured voltage offset,  $U_{\text{TE,m}}$ , is expressed as

$$U_{\text{TE,m}} \approx U_{\text{TE}} + I_{\text{os}} R_M - U_{\text{os}} = U_{\text{TE}} + U_0, \quad (\text{S4})$$

where  $U_0 = I_{\text{os}} R_M - U_{\text{os}}$  is the offset voltage due to the circuit, which remains constant if  $U_{\text{os}}$  and  $I_{\text{os}}$  are stable over time.

Fig. S1b plots the measured voltage offset of the circuit with a dummy resistor at the input to simulate the molecular junction. It shows that the circuit becomes stabilized in ~30 minutes after turning on the power. In addition, baking the STM tip by placing a heat source in close proximity (no direct contact) doesn't change the offset. We typically left the circuit on overnight to ensure maximum stability.

### Relationship between thermopower and energy level alignment:

The transmission function for a molecular junction can be described in terms of Lorentian functions, given by

$$\tau(E) = \sum_n^N \frac{\Gamma_{n,1}\Gamma_{n,2}}{(\Gamma_{n,1}+\Gamma_{n,2})^2/4+(E-\varepsilon_n)^2}, \quad (\text{S5})$$

where  $\varepsilon_n$  is the energy level of the  $n^{\text{th}}$  molecular orbital, and  $\Gamma_{n,1}$  and  $\Gamma_{n,2}$  describe the couplings of the  $n^{\text{th}}$  molecular orbital to first and second electrodes, respectively.

Assuming that molecule-electrode contacts are symmetric and the HOMO of the molecule dominates the charge transport, then Eq. S5 can be simplified as

$$\tau(E) = \frac{\Gamma_H^2}{\Gamma_H^2+(E-\varepsilon_H)^2}, \quad (\text{S6})$$

where  $\varepsilon_H$  is the energy level of the HOMO, and  $\Gamma_H$  is the coupling of the HOMO to the electrodes.

If further assuming that  $\Gamma_H$  is energy-independent (the wideband approximation), the thermopower can be expressed as,

$$S_{\text{junction}} = -\frac{\pi^2 k_B^2 T}{3|e|} \frac{\partial \ln(\tau(E))}{\partial E} \Big|_{E=E_F} = \frac{\pi^2 k_B^2 T}{3|e|} \frac{2(E_F-\varepsilon_H)}{\Gamma_H^2+(E_F-\varepsilon_H)^2}. \quad (\text{S7})$$

From the works by Bâldea (Refs. S1 and S2), the transition voltage is

$$|e|V_t = \frac{2}{\sqrt{3}}(E_F - \varepsilon_H) + \frac{11}{\sqrt{3}} \frac{\Gamma_H^2}{3(E_F - \varepsilon_H)}. \quad (\text{S8})$$

For weak molecule-electrode coupling,  $(E_F - \varepsilon_H)^2 \gg \Gamma_H^2$ , the thermopower is given by

$$S_{\text{junction}} \approx \frac{\pi^2 k_B^2 T}{3|e|} \frac{2}{(E_F - \varepsilon_H)}. \quad (\text{S9})$$

Since the transition voltage reflects the energy barrier height of the molecular junction, we have

$$|e|V_t \approx \frac{2}{\sqrt{3}}(E_F - \varepsilon_H). \quad (\text{S10}).$$

Combining Eqs. S9 and S10, the thermopower at 300K is

$$S_{\text{junction}} \approx \frac{4\pi^2 k_B^2 T}{3\sqrt{3}e^2} \frac{1}{V_t} \approx \frac{A}{V_t}, \quad (\text{S11})$$

where  $A = 16.93 \mu\text{V} \cdot \text{V}/\text{K}$ .

### Correlation analysis

As a measure of dependence between two sets of data  $X$  and  $Y$ , the Pearson's correlation coefficient is defined as:

$$r_{xy} = \frac{\sum_{i=1}^n (x_i - \bar{x})(y_i - \bar{y})}{(n-1)s_x s_y} \quad (\text{S12})$$

where  $x_i$  and  $y_i$  are individual data points in  $X$  and  $Y$  ( $i = 1, 2, \dots, n$ ),  $\bar{x}$  and  $\bar{y}$  are the sample means of  $X$  and  $Y$ , and  $s_x$  and  $s_y$  are the sample standard deviation of  $X$  and  $Y$ .  $r_{xy}$  varies between -1 and 1, indicating the degree of linear dependence between  $X$  and  $Y$ . If  $X$  and  $Y$  are uncorrelated,  $r_{xy}$  will be zero. And  $r_{xy}$  is 1 in the case of a perfect positive linear correlation and -1 in the case of a perfect negative linear correlation.

### Single molecule transition voltage spectroscopy

After obtaining the I-V curves for single molecular junctions (Figs. S2a and S2d), one can get 4 G-V curves by dividing current by bias (Figs. S2b and S2e). As thousands of curves need to be processed within reasonable time, all G-V curves are fitted using second order polynomial before re-plotting using  $\ln(I/V^2)$  vs.  $1/V$  axes, known as Fowler-Nordheim plot (Figs. S2c and S2f). The corresponding bias at minimum point in such plot is the transition voltage, which is a measure of the energy difference between the frontier molecular orbital and the electrodes' Fermi energy.

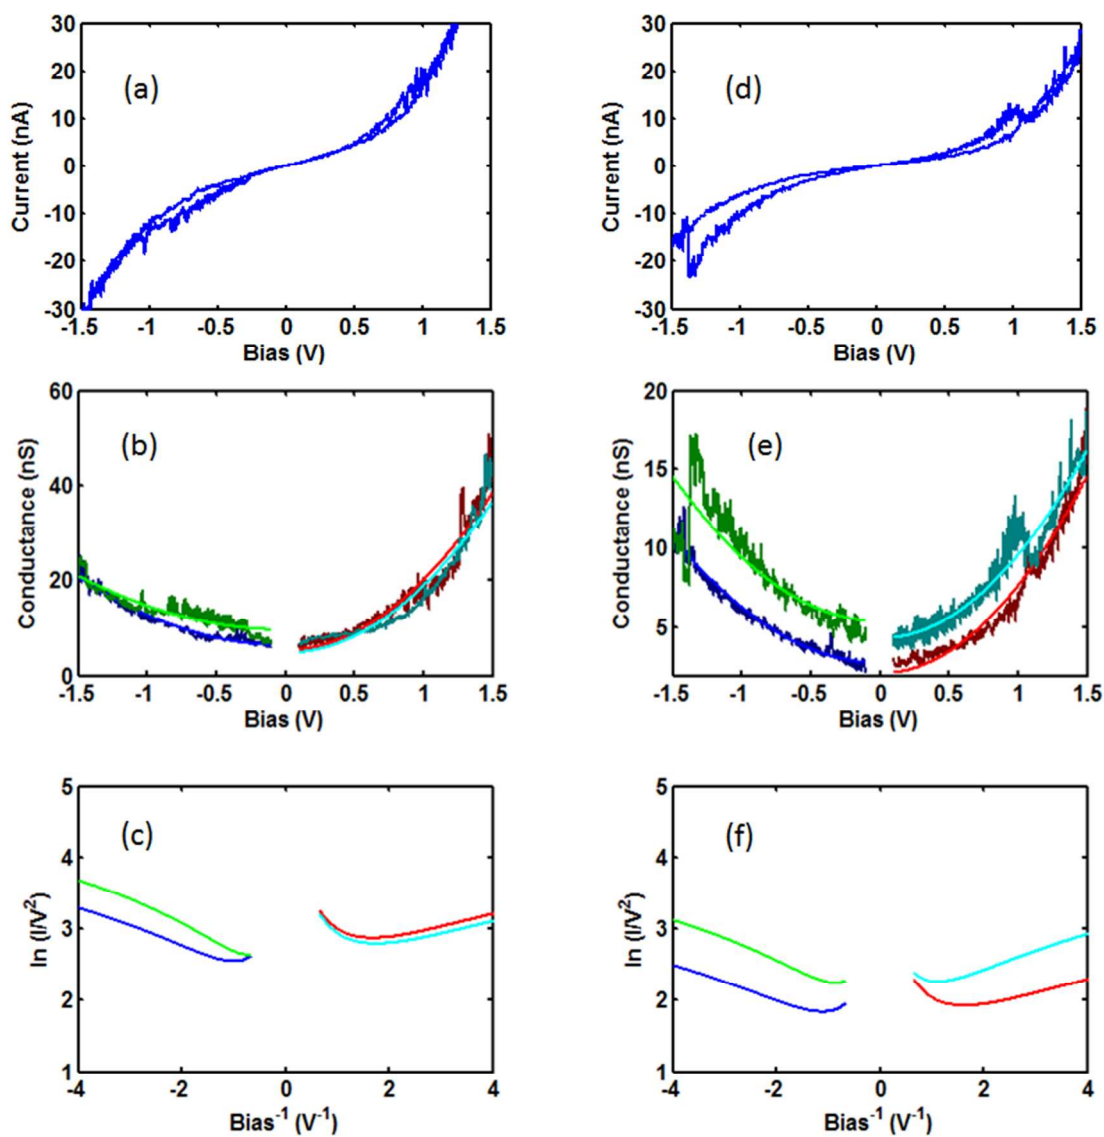

Fig. S2. Examples of I-V, G-V and TVS curves for DMS molecule.

#### References

- S1. Bâldea, I. *Journal of the American Chemical Society* **2012**, 134, (18), 7958-7962.
- S2. Bâldea, I. *Chemical Physics* **2012**, 400, (0), 65-71.
